# Supplementary material for: Modulation of the β-Catenin Signaling Pathway by the Dishevelled-Associated Protein Hipk1
Source: PubMed Central journal article supplement (PMC2629544; doi:10.1371/journal.pone.0004310), 2009-02-02
Supplement: pone.0004310.s001.pdf [file pone.0004310.s001.pdf]

# Figure S1

```
1 50
HIPK1_Hs (1) -----MASQLQVFSP--PSVSSSAFCSAKKLEEPS-GWDVSGQSSND
HIPK1_Mm (1) -----MASQLQVFSP--PSVSSSAFCSAKKLEEPS-GWDVSGQSSND
HIPK1_Gg (1) -----MASQLQVFSP--PSVSSSAFCSAKKLEEPS-VWDVSGQSSSD
HIPK1_Xt (1) -----MASQLQVFSP--SSVSSSAFCSAKKLEEPS-GWDVTGQGSSN
HIPK1_X1 (1) -----MASQLQVFSP--SSVSSSAFYSAKKLEEPS-GWDVTGQGSSS
HIPK2_Hs (1) MAPVYEGMASHVQVFSP--HTLQSSAFCSVKKLEEPSNNDMTGYGSHS
HIPK2_Mm (1) MAPVYEGMASHVQVFSP--HTLQSSAFCSVKKLEEPSNNDMTGYGSHS
HIPK2_Gg (1) -----MASHVQVFSP--HTLQSSAFCSVKKLEEPSNNDMTGYGTHS
HIPK2_Xt (1) -----MASHLQIFSS--HGLPLRTFCKVKKPKLELSPGWDMTGYGCHS
HIPK3_Hs (1) -----MASQVLVYPPYVYQTQSSAFCSVKKLEEPS--SCVFQERNYP
HIPK3_Mm (1) -----MASQVLVYPPYVYQTQSSAFCSVKKLEEPS--GCVFQERTYP
HIPK3_Gg (1) -----MASQVLVYPPYVYQTQSSAFCSVKKLEEPS--SCVYHERAYP
HIPK3_Xt (1) -----MASQVLVYPPYVYQTQSSAFCSIKKLEEPS--SCLYNKRSYQ

51 100
HIPK1_Hs (41) KYYTHSKTLPATQGGQANSSHQ---VANFNIPAYDQGLLLPAPAVEHIVVT
HIPK1_Mm (41) KYYTHSKTLPATQGGQASSHQ---VANFNLPAYDQGLLLPAPAVEHIVVT
HIPK1_Gg (41) KYYTHSKNLPAAQGGQASSHQ---VANFSVPAYDQNLLLPAPSVEHIVVT
HIPK1_Xt (41) KYYTHTKNLPVAQGHASSHQ---VAGFSLPAYEPNLLIPAAAAEHIVVT
HIPK1_X1 (41) KYYTR--NLPVAQGHASSRQ---VVGFSLPAYEPNLLIPAAAAEHIVVT
HIPK2_Hs (49) KVYSQSKNIPLS-QPATTTVSTSLPVPNPSLPYEQTIVFPSTGHIVVTS
HIPK2_Mm (49) KVYSQSKNIPPS-QPASTTVSTSLPIPNSLPYEQTIIFFPGSTGHIVVTS
HIPK2_Gg (42) KVYSQSKSVQSSQAAAAAVNASLQIPNPSIPIYEQTIIFFPASTGHIVVTS
HIPK2_Xt (42) KVVNSGKNSSTS-----GQP-VLSHASLLQSYEQTVIFPSTAGHIVVTS
HIPK3_Hs (42) RTYVNGRNFNGNSHPPTKG-SAFQTKIPFNRPRGHNFSLQTSAVVLKNTAG
HIPK3_Mm (42) QIHVNGRNFNGNSHPSTKG-SAFQTNIPFTKPRGHSFSLQAGAIIVKDTAG
HIPK3_Gg (42) QIYVNGKNFG-ISPFRVS-TFLQTKNPFDRPRGQNVLLQSNVAALKNIAG
HIPK3_Xt (42) RTDLNARSIGFAQPSNKNRAPFQTKNTSDKPRHQAAVSKTSPVTLTNTGT

101 150
HIPK1_Hs (88) AADSSG--SAATSTFQSS-QTLTHRSNVSLLEPYQKCGLKRKSEEVDS-N
HIPK1_Mm (88) AADSSG--SAATATFQSS-QTLTHRSNVSLLEPYQKCGLKRKSEEVES-N
HIPK1_Gg (88) AADSTG--SSATASFQNS-QTLTHRTNLSLLEPYQKCGLKRKSEEVDS-N
HIPK1_Xt (88) AADSTD--SGPTTSFQNS-QILTHRSNVPLLDPYQKCGLKRKSEEVDS-N
HIPK1_X1 (86) AADSTD--SGPTTSFQNS-QILTHRSNVPLLDPYQKCGLKRKSEEVDS-N
HIPK2_Hs (98) ASSTS----VTGQVLGGP-HNLMRRSTVSLLDTYQKCGLKRKSEEIEN-T
HIPK2_Mm (98) ASSTS----VTGQVLGGP-HNLMRRSTVSLLDTYQKCGLKRKSEEIEN-T
HIPK2_Gg (92) ANSTSGVVAVSGQTLGGP-HNLMRRSTVSLLDTYQKCGLKRKSEEIEN-T
HIPK2_Xt (85) SSNGSS--AATGQALGGPQTNLMRRSTVSLLDTYQKCGLKRKCEELEN-N
HIPK3_Hs (91) ATKVIAAQAQQAHVQAPQ--IGAWRNRLHFLEGPQRCGLKRKSEELD NHS
HIPK3_Mm (91) ATKVIAAQAQQAQVEAPR--AVVWRNRLHFLEGPQRCGLKRKSEELENHS
HIPK3_Gg (90) ATKALAAQAQQAQLEAPR--SGTQGSRADILEGPQRCGLKRKSEELD NHS
HIPK3_Xt (92) ASGDLAAQAQQDPKEELT--VGTPESGSDDLDAHQRCGLKRKSKDFENQN

151 200
HIPK1_Hs (134) GSVQIIIEHPPMLQNRVVGAAATTTT VTTK--SSSSSGEGDYQLVQHE
HIPK1_Mm (134) GSVQIIIEHPPMLQNRVVGAAATTTT VTTK--SSSSSGEGDYQLVQHE
HIPK1_Gg (134) GSVQIIIEHPPMLQNRPAVGAATTTT VTTK--SSNSSGEGDYQLVQHE
HIPK1_Xt (134) GSVQIIDERPPLMLQNRVVGAAATTTT VTTK--SSSSNGEGDYQLVQHE
HIPK1_X1 (132) GSVQIIDERPPLMLQNRVVGAAATTTT VTTK--SSSSSGG DYQLVQHE
HIPK2_Hs (142) SSVQIIIEHPPMIQNNASGATVATATTSTATSK-NSGSNSEGDYQLVQHE
HIPK2_Mm (142) SSVQIIIEHPPMIQNNASGATVATATTSTATSK-NSGSNSEGDYQLVQHE
HIPK2_Gg (140) SSVQIIIEHPPMIQNNASGATVATATTSTATSK-NSGSNSEGDYQLVQHE
HIPK2_Xt (132) SSVQIVDEHPPVTQNNASGATAATTSTATSK--NSGSNSEGDYQLVQHE
HIPK3_Hs (139) SAMQIVDELSILPAMLQTNMGNPVTVVTTATTGSKQNC TTGEGDYQLVQHE
HIPK3_Mm (139) GAMQIVDELSILPAMLQTNMGNPVTVVTTATTGSKQNC TTGEGDYQLVQHE
HIPK3_Gg (138) STMQIVDELSILPAMLQTNVGNPVTVVTTAATSKQTGTSGDGDYQLVQHE
HIPK3_Xt (140) GTMQIVDELSILPAML PNNAANQVTVVATTGT SKQSTASGDGDYQLMLHE
```

ATP-binding/ Kinase Domain → 250

|                 |       |                                                                                 |     |
|-----------------|-------|---------------------------------------------------------------------------------|-----|
|                 | 201   |                                                                                 | 250 |
| HIPK1_Hs        | (182) | ILCSMTNSYEVL <del>EFL</del> GRGTFGQVAKC <del>WKRSTKEIVAIK</del> ILKNHPSYARQG    |     |
| HIPK1_Mm        | (182) | ILCSMTNSYEVL <del>EFL</del> GRGTFGQVAKC <del>WKRSTKEIVAIK</del> ILKNHPSYARQG    |     |
| HIPK1_Gg        | (182) | ILCSMTNSYEVL <del>EFL</del> GRGTFGQVAKC <del>WKRSTKEIVAIK</del> ILKNHPSYARQG    |     |
| HIPK1_Xt        | (182) | ILCSMTNSYEVL <del>EFL</del> GRGTFGQVAKC <del>WKRSTKEIVAIK</del> ILKNHPSYARQG    |     |
| <b>HIPK1_X1</b> | (180) | <b>ILCSMTNSYEVL<del>EFL</del>GRGTFGQVAKC<del>WKRSTKEIVAIK</del>ILKNHPSYARQG</b> |     |
| HIPK2_Hs        | (191) | VLCSMTNTYEVL <del>EFL</del> GRGTFGQVVKC <del>WKRGTNEIVAIK</del> ILKNHPSYARQG    |     |
| HIPK2_Mm        | (191) | VLCSMTNTYEVL <del>EFL</del> GRGTFGQVVKC <del>WKRGTNEIVAIK</del> ILKNHPSYARQG    |     |
| HIPK2_Gg        | (189) | VLCSMTNTYEVL <del>EFL</del> GRGTFGQVVKC <del>WKRGTNEIVAIK</del> ILKNHPSYARQG    |     |
| HIPK2_Xt        | (179) | VLCSMTNTYEVL <del>EFL</del> GRGTFGQVVKC <del>WKRGTNEIVAIK</del> ILKNHPSYARQG    |     |
| HIPK3_Hs        | (189) | VLCSMKNTYEVL <del>DFL</del> GRGTFGQVVKC <del>WKRGTNEIVAIK</del> ILKNHPSYARQG    |     |
| HIPK3_Mm        | (189) | VLCSMKNTYEVL <del>DFL</del> GRGTFGQVVKC <del>WKRGTNEIVAIK</del> ILKNHPSYARQG    |     |
| HIPK3_Gg        | (188) | VLCSVKNTYEVL <del>DFL</del> GRGTFGQVVKC <del>WKRGTNEIVAIK</del> ILKNHPSYARQG    |     |
| HIPK3_Xt        | (190) | VLCSVKNTYEVL <del>DFL</del> GRGTFGQVVKC <del>WRRGTNEVVAVK</del> ILKNHPSYARQG    |     |

|                 |       |                                                                                                        |     |
|-----------------|-------|--------------------------------------------------------------------------------------------------------|-----|
|                 | 251   |                                                                                                        | 300 |
| HIPK1_Hs        | (232) | QIEVSI <del>L</del> SRLSSENADEYNFVRSYECFQHK <del>NHT</del> CLVFEMLEQNL <del>YDFL</del> KQ              |     |
| HIPK1_Mm        | (232) | QIEVSI <del>L</del> SRLSSENADEYNFVRSYECFQHK <del>NHT</del> CLVFEMLEQNL <del>YDFL</del> KQ              |     |
| HIPK1_Gg        | (232) | QIEVSI <del>L</del> SRLSSENADEYNFVRSYECFQHK <del>NHT</del> CLVFEMLEQNL <del>YDFL</del> KQ              |     |
| HIPK1_Xt        | (232) | QIEVSI <del>L</del> SRLSSENADEYNFVRSYECFQHK <del>NHT</del> CLVFEMLEQNL <del>YDFL</del> KQ              |     |
| <b>HIPK1_X1</b> | (230) | <b>QIEVSI<del>L</del>SRLSSENADEYNFVRSYECFQHK<del>NHT</del>CLVFEMLEQNL<del>YDFL</del>KQ</b>             |     |
| HIPK2_Hs        | (241) | QIEVSI <del>L</del> ARLSTESAD <del>D</del> YNFVRAYECFQHK <del>NHT</del> CLVFEMLEQNL <del>YDFL</del> KQ |     |
| HIPK2_Mm        | (241) | QIEVSI <del>L</del> ARLSTESAD <del>D</del> YNFVRAYECFQHK <del>NHT</del> CLVFEMLEQNL <del>YDFL</del> KQ |     |
| HIPK2_Gg        | (239) | QIEVSI <del>L</del> ARLSTESAD <del>D</del> YNFVRAYECFQHK <del>NHT</del> CLVFEMLEQNL <del>YDFL</del> KQ |     |
| HIPK2_Xt        | (229) | QIEVSI <del>L</del> ARLSTESAD <del>D</del> YNFVRAYECFQHK <del>NHT</del> CLVFEMLEQNL <del>YDFL</del> KQ |     |
| HIPK3_Hs        | (239) | QIEVSI <del>L</del> ARLSTENADEYNFVRAYECFQHR <del>NHT</del> CLVFEMLEQNL <del>YDFL</del> KQ              |     |
| HIPK3_Mm        | (239) | QIEVSI <del>L</del> ARLSTENADEYNFVRAYECFQHR <del>NHT</del> CLVFEMLEQNL <del>YDFL</del> KQ              |     |
| HIPK3_Gg        | (238) | QIEVSI <del>L</del> ARLSTENADEFNFVRAYECFQHR <del>NHT</del> CLVFEMLEQNL <del>YDFL</del> KQ              |     |
| HIPK3_Xt        | (240) | QIE <del>M</del> GILARLSNENADEFNFVRAYECFQHR <del>NHT</del> CLVFEMLEQNL <del>YDFL</del> KQ              |     |

|                 |       |                                                                                                        |     |
|-----------------|-------|--------------------------------------------------------------------------------------------------------|-----|
|                 | 301   |                                                                                                        | 350 |
| HIPK1_Hs        | (282) | NKFSPLPLKYIRPILQQVATALMKL <del>K</del> SLGLIHADL <del>K</del> PENIMLVDPVRQPY                           |     |
| HIPK1_Mm        | (282) | NKFSPLPLKYIRPILQQVATALMKL <del>K</del> SLGLIHADL <del>K</del> PENIMLVDPVRQPY                           |     |
| HIPK1_Gg        | (282) | NKFSPLPLKYIRPILQQVATALMKL <del>K</del> SLGLIHADL <del>K</del> PENIMLVDPARQPY                           |     |
| HIPK1_Xt        | (282) | NKFSPLPLKYIRPILQQVATALMKL <del>K</del> SLGLIHADL <del>K</del> PENIMLVDPVRQPY                           |     |
| <b>HIPK1_X1</b> | (280) | <b>NKFSPLPLKYIRPILQQVATALMKL<del>K</del>SLGLIHADL<del>K</del>PENIMLVDPVRQPY</b>                        |     |
| HIPK2_Hs        | (291) | NKFSPLPLKYIRPVLQQVATALMKL <del>K</del> SLGLIHADL <del>K</del> PENIMLVDP <del>S</del> RQPY              |     |
| HIPK2_Mm        | (291) | NKFSPLPLKYIRPVLQQVATALMKL <del>K</del> SLGLIHADL <del>K</del> PENIMLVDP <del>S</del> RQPY              |     |
| HIPK2_Gg        | (289) | NKFSPLPLKYIRPILQQVATALMKL <del>K</del> SLGLIHADL <del>K</del> PENIMLVDP <del>S</del> RQPY              |     |
| HIPK2_Xt        | (279) | NKFSPLPLKYIRPVLQQVGTALMKL <del>K</del> SLGLIHADL <del>K</del> PENIMLVDP <del>S</del> RQPY              |     |
| HIPK3_Hs        | (289) | NKFSPLPLKVIRPILQQVATALK <del>K</del> L <del>K</del> SLGLIHADL <del>K</del> PENIMLVDPVRQPY              |     |
| HIPK3_Mm        | (289) | NKFSPLPLKVIRPVLQQVATALK <del>K</del> L <del>K</del> SLGLIHADL <del>K</del> PENIMLVDPVRQPY              |     |
| HIPK3_Gg        | (288) | NKFSPLQ <del>L</del> KVIRPILQQVATALK <del>K</del> L <del>K</del> SLGLIHADL <del>K</del> PENIMLVDPVRQPY |     |
| HIPK3_Xt        | (290) | NKFSPLPLKVIRAILQQVATALK <del>K</del> L <del>K</del> SLGLIHADL <del>K</del> PENIMLVDPVRQPY              |     |

|                 |       |                                                                      |     |
|-----------------|-------|----------------------------------------------------------------------|-----|
|                 | 351   |                                                                      | 400 |
| HIPK1_Hs        | (332) | RVKVIDFGSASHVSKAVCSTYLQSRYYRAPEIILGLPFCEAIDMWSL <del>G</del> CV      |     |
| HIPK1_Mm        | (332) | RVKVIDFGSASHVSKAVCSTYLQSRYYRAPEIILGLPFCEAIDMWSL <del>G</del> CV      |     |
| HIPK1_Gg        | (332) | RVKVIDFGSASHVSKAVCSTYLQSRYYRAPEIILGLPFCEAIDMWSL <del>G</del> CV      |     |
| HIPK1_Xt        | (332) | RVKVIDFGSASHVSKAVCSTYLQSRYYRAPEIILGLPFCEAIDMWSL <del>G</del> CV      |     |
| <b>HIPK1_X1</b> | (330) | <b>RMKVIDFGSASHVSKAVCSTYLQSRYYRAPEIILGLPFCEAIDMWSL<del>G</del>CV</b> |     |
| HIPK2_Hs        | (341) | RVKVIDFGSASHVSKAVCSTYLQSRYYRAPEIILGLPFCEAIDMWSL <del>G</del> CV      |     |
| HIPK2_Mm        | (341) | RVKVIDFGSASHVSKAVCSTYLQSRYYRAPEIILGLPFCEAIDMWSL <del>G</del> CV      |     |
| HIPK2_Gg        | (339) | RVKVIDFGSASHVSKAVCSTYLQSRYYRAPEIILGLPFCEAIDMWSL <del>G</del> CV      |     |
| HIPK2_Xt        | (329) | RVKVIDFGSASHVSKAVCSTYLQSRYYRAPEIILGLPFCEAIDMWSL <del>G</del> CV      |     |
| HIPK3_Hs        | (339) | RVKVIDFGSASHVSKTVCSTYLQSRYYRAPEIILGLPFCEAIDMWSL <del>G</del> CV      |     |
| HIPK3_Mm        | (339) | RVKVIDFGSASHVSKTVCSTYLQSRYYRAPEIILGLPFCEAIDMWSL <del>G</del> CV      |     |
| HIPK3_Gg        | (338) | RVKVIDFGSASHVSKTICSTYLQSRYYRAPEIILGLPFCEAIDMWSL <del>G</del> CV      |     |
| HIPK3_Xt        | (340) | RVKVIDFGSASYVSKTVCSTYLQSRYYRAPEVILGLPFCEAIDMWSL <del>G</del> CV      |     |

401 450  
HIPK1\_Hs (382) IAELFLGWPLYPGASEYDQIRYISQTQGLPAEYLLSAGTKTTRFFNRDPN  
HIPK1\_Mm (382) IAELFLGWPLYPGASEYDQIRYISQTQGLPAEYLLSAGTKTTRFFNRDPN  
HIPK1\_Gg (382) IAELFLGWPLYPGASEYDQIRYISQTQGLPAEYLLSAGTKTSRFFNRDPN  
HIPK1\_Xt (382) IAELFLGWPLYPGASEYDQIRYISQTQGLPAEYLLSAGTKTSRFFNRDPD  
**HIPK1\_X1** (380) **IAELFLGWPLYPGASEYDQIRYISQTQGLPAEYLLSAGTKTSRFFNRDPD**  
HIPK2\_Hs (391) IAELFLGWPLYPGASEYDQIRYISQTQGLPAEYLLSAGTKTTRFFNRDTD  
HIPK2\_Mm (391) IAELFLGWPLYPGASEYDQIRYISQTQGLPAEYLLSAGTKTTRFFNRDTD  
HIPK2\_Gg (389) IAELFLGWPLYPGASEYDQIRYISQTQGLPAEYLLSAGTKTTRFFNRDTD  
HIPK2\_Xt (379) IAELFLGWPLYPGASEYDQIRYISQTQGLPAEYLLSSGKTKTTRFFNRDGD  
HIPK3\_Hs (389) IAELFLGWPLYPGALEYDQIRYISQTQGLPGEQLLNVTGKSTRFFCKETD  
HIPK3\_Mm (389) IAELFLGWPLYPGALEYDQIRYISQTQGLPGEQLLNVTGKSTRFFCRETD  
HIPK3\_Gg (388) IAELFLGWPLYPGALEYDQIRYISQTQGLPGEQLLSMGTKTARFFCRETD  
HIPK3\_Xt (390) IAELFLGWPLYPGAQYDQIRYISQTQGLPGDSLINAGTKTSRFFCREPD

451 500  
HIPK1\_Hs (432) LGYPLWRLKTPEEHELETGIKSKEARKYIFNCLDDMAQVNMSTDLEGTDM  
HIPK1\_Mm (432) LGYPLWRLKTPEEHELETGIKSKEARKYIFNCLDDMAQVNMSTDLEGTDM  
HIPK1\_Gg (432) LGYPLWRLKTPDEHEMETGIKSKEARKYIFNCLDDMAQVNMSTDLEGTDM  
HIPK1\_Xt (432) LGYPLWRLKAPDEHEMETGIKSKEARKYIFNCLDDMAQVNMSTDLEGTDM  
**HIPK1\_X1** (430) **LGYPWRLKAPDEHEVETGIKSKEARKYIFNCLDDMAQVNMSTDLEGTDM**  
HIPK2\_Hs (441) SPYPLWRLKTPDDHEAETGIKSKEARKYIFNCLDDMAQVNMSTDLEGSMD  
HIPK2\_Mm (441) SPYPLWRLKTPDDHEAETGIKSKEARKYIFNCLDDMAQVNMSTDLEGSMD  
HIPK2\_Gg (439) SPYPLWRLKTPDDHEAETGIKSKEARKYIFNCLDDMAQVNMSTDLEGSMD  
HIPK2\_Xt (429) SPYPLWRLKTPEDHENETGIKSKEARKYIFNCLDDMAQVNMASDLEGSMD  
HIPK3\_Hs (439) MSHSGWRLKTL EEHEAETGMKSKEARKYIFNSLDDVAHVNTVM DLEGSDDL  
HIPK3\_Mm (439) MSHSGWRLKTL EEHEAETGMKSKEARKYIFNSLDDIVHVNTVM DLEGGDDL  
HIPK3\_Gg (438) APYSSWRLKTL EEHEAETGMKSKEARKYIFNSLDDIVHVNMVM DLEGSDDL  
HIPK3\_Xt (440) APYPSWRLKTL EEHEAETGIKSKEARKYIFNNLDEIVHVNMV DLDGSDDL

501 ← Kinase Domain 550  
HIPK1\_Hs (482) LAEKADRREYIDLLKKMLTIDADKRITPLKTLNHQFVTMTHLLDFPHSNH  
HIPK1\_Mm (482) LAEKADRREYIDLLKKMLTIDADKRITPLKTLNHQFVTMTHLLDFPHSSH  
HIPK1\_Gg (482) LAEKADRREYIDLLKKMLTIDADKRITPLKTLNHPFVTMTHLLDFPHSNH  
HIPK1\_Xt (482) LAEKADRREYIDLLKKMLTIDADKRITPLKTLNHPFVTMTHLLDFPHSNH  
**HIPK1\_X1** (480) **LAEKADRREYIDLLKKMLTIDADKRITPLKTLNHPFVTMTHLLDFPHSNH**  
HIPK2\_Hs (491) LVEKADRREFIDLLKKMLTIDADKRITPIETLNHPFVTMTHLLDFPHSTH  
HIPK2\_Mm (491) LVEKADRREFIDLLKKMLTIDADKRITPIETLNHPFVTMTHLLDFPHSAH  
HIPK2\_Gg (489) LVEKADRREFIDLLKKMLTIDADKRITPIETLNHPFVTMTHLLDFPHSTH  
HIPK2\_Xt (479) LVEKADRREFIDLLKKMLTIDADKRITPIETLNHPFVTMTHLLDFPHSSH  
HIPK3\_Hs (489) LAEKADRREFVSLKKMLLIDADLRITPAETLNHPFVNMKHLDFPHSNH  
HIPK3\_Mm (489) LAEKADRREFVNLKKMLLIDADLRITPIETLNHPFVNMKHLDFPHSNH  
HIPK3\_Gg (488) LAEKADRREFVSLKKMLLIDADLRITPAETLNHSFVTM KHLDFPHSNQ  
HIPK3\_Xt (490) MAEKADRREFVALLKKMLMIDADKRISPADTLSQSFITM KHLDFPHSNH

551 Homeodomain-Interacting Domain 600  
HIPK1\_Hs (532) VKSCFQNM EICKRRVHMYDTVSIKSPFTTHVAPNTSTNLTMSFSNQLNT  
HIPK1\_Mm (532) VKSCFQNM EICKRRVHMYDTVSIKSPFTTHVAPNTSTNLTMSFSNQLNT  
HIPK1\_Gg (532) VKSCFQNM EICKRRVHMYDTVSIKSPFTTHVAPNTSTNLTMSFNNQLNT  
HIPK1\_Xt (532) VKSCFQNM EICKRRSVMYDTVSIKSPFTTHVAPNTSTNLTMSFNNQLNS  
**HIPK1\_X1** (530) **VKSCFQNM EICKRRSVMYDTVSIKSPFTTHVAPNTSTNLTMSFNNQLNS**  
HIPK2\_Hs (541) VKSCFQNM EICKRRVHMYDTVSIKSPFTTHVAPNTSTNLTMTFNNQLTT  
HIPK2\_Mm (541) VKSCFQNM EICKRRVHMYDTVSIKSPFTTHVAPNTSTNLTMTFNNQLTT  
HIPK2\_Gg (539) VKSCFQNM EICKRRVHMYDTVSIKSPFTTHVAPNTSTNLTMTFNNQLNT  
HIPK2\_Xt (529) VKSCFQNM EICKRRVHMYDTVSIKSPFTTHVAPNTSTNLTMTFNNQLNT  
HIPK3\_Hs (539) VKSCFHIMDICKSHLNSCDTNNHNKTSLLRPVASSSTATLTANFT-KIGT  
HIPK3\_Mm (539) VKSCFHIMDICKSPS-SCETNNHSMKSLLRPVASNGTAALANFT-KVGT  
HIPK3\_Gg (538) VKSCFHIMDVCKCRSNLYDLSNRNKTSLMRPVASGSAANLTASFT-KIGT  
HIPK3\_Xt (540) VKSCFYIMDVCKARPVNGDTANHNKTSIVRPITSTNIGSMSAGFT-KIGT

|                 |       |                |                           |                     |
|-----------------|-------|----------------|---------------------------|---------------------|
|                 |       | 601            |                           | 650                 |
| HIPK1_Hs        | (582) | VHNQASV        | VLASSSTAAAATLSLANS        | VDVSLLNYSALY        |
| HIPK1_Mm        | (582) | VHNQASV        | VLASSSTAAAATLSLANS        | VDVSLLNYSALY        |
| HIPK1_Gg        | (582) | VHNQASV        | VLASN-STAAAATLSLANS       | VDVSLLNYSALY        |
| HIPK1_Xt        | (582) | VHNQASV        | VLASS-STAAAATLSLANS       | VDVSLLNYSALY        |
| <b>HIPK1_X1</b> | (580) | <b>VHNQASV</b> | <b>LASS-STAAAATLSLANS</b> | <b>VDVSLLNYSALY</b> |
| HIPK2_Hs        | (591) | VHN            | -----                     | QPSAASMAAVAQRS      |
| HIPK2_Mm        | (591) | VHNQAP         | ---T---TSSATLSLAN         | PEVSILNYSALY        |
| HIPK2_Gg        | (589) | VHNQTTN        | LAPT---SSSATISLAN         | PEVSILNYSALY        |
| HIPK2_Xt        | (579) | VHS            | -----                     | QPTAASMAAVAQRT      |
| HIPK3_Hs        | (588) | LRSQ           | -----                     | ALTTSAHSVHHG        |
| HIPK3_Mm        | (587) | LRSQ           | -----                     | ALTTSAHSVHHG        |
| HIPK3_Gg        | (587) | LRSQ           | -----                     | ALTASAHSVHQQ        |
| HIPK3_Xt        | (589) | IRGQ           | -----                     | ALTTSGHSVHHG        |

|                 |       |                 |                     |                                       |
|-----------------|-------|-----------------|---------------------|---------------------------------------|
|                 |       | 651             |                     | 700                                   |
| HIPK1_Hs        | (632) | VSLQPGTT        | QICTQTDPFQQT        | FIVCPPAFQTG-LQATTKHSGFPVRMDNAV        |
| HIPK1_Mm        | (632) | VSLQPGTT        | QICTQTDPFQQT        | FIVCPPAFQTG-LQATTKHSGFPVRMDNAV        |
| HIPK1_Gg        | (631) | VSLQPGTT        | QICTQTDPFQQT        | FIVCPPAFQTG-LQATTKHSGFPVRMDNAV        |
| HIPK1_Xt        | (631) | VSLQPGTT        | QLCTQTDPFQQT        | FIVCPPAFQAAGLQATTKHSGFPVRMDNSV        |
| <b>HIPK1_X1</b> | (629) | <b>VSLQPGTT</b> | <b>QLCTQTDPFQQT</b> | <b>FIVCPPAFQAAGLQATTKHSGFPVRMDNSV</b> |
| HIPK2_Hs        | (608) | MPLQTGTA        | QICARPDFQALIVC      | PPGFQGL-QASPSKHAGYSVRMDNAV            |
| HIPK2_Mm        | (635) | MPLQTGTA        | QICARPDFQALIVC      | PPGFQGL-QASPSKHAGYSVRMDNAV            |
| HIPK2_Gg        | (637) | MPLQTGTA        | QICARPDFQALIVC      | PPGFQGL-QASPSKHAGYSVRMDNAV            |
| HIPK2_Xt        | (596) | MPLQTGTA        | QLCARPDFQALIVC      | PPAFQGL-QTSPSKHGGYSVRMDNAV            |
| HIPK3_Hs        | (605) | IPLQAGTA        | QFGCG-DAFQOTLI      | ICPPAIQGI-PATHGKPTSYSIRVDNTV          |
| HIPK3_Mm        | (604) | IPLQAGTA        | QFGCG-DAFHQTLI      | ICPPAIQGI-PAAHGKPTSYSIRVDNTV          |
| HIPK3_Gg        | (604) | IPLQAGTA        | QFGCS-DIFQOTLI      | ICPPTLQGI-TTNHSGKPTSFSLRVDNAV         |
| HIPK3_Xt        | (606) | IPLQAGS         | APFGCN-DAFQOTLI     | LICPPAIQGM-PPNHGKPTSYSVRVDNAV         |

|                 |       |                  |                     |                             |
|-----------------|-------|------------------|---------------------|-----------------------------|
|                 |       | 701              |                     | 750                         |
| HIPK1_Hs        | (681) | PIVPQAPAA        | QPLQIQSGVLTQGS      | CTPLMVATLHPQVATITPQYAVPFTLS |
| HIPK1_Mm        | (681) | PIVPQAPAA        | QPLQIQSGVLTQGS      | CTPLMVATLHPQVATITPQYAVPFTLS |
| HIPK1_Gg        | (680) | PIVPQAPAA        | QPLQIQSGVLTQGS      | CTPLMVATLHPQVATITPQYAVPFTLN |
| HIPK1_Xt        | (681) | PIVPQAPAA        | QPLQIQSGVLTQ        | -----                       |
| <b>HIPK1_X1</b> | (679) | <b>PIVPQAPAA</b> | <b>QPPQIQSGVLTQ</b> | -----                       |
| HIPK2_Hs        | (657) | PIVTQAPGA        | QPLQIQPGLLAQ        | -----                       |
| HIPK2_Mm        | (684) | PIVTQAPGA        | QPLQIQPGLLAQ        | -----                       |
| HIPK2_Gg        | (686) | PIVTQAPGA        | QPLQIQPGLLAQ        | -----                       |
| HIPK2_Xt        | (645) | PLVTQTAGA        | QALQIQPGLLTQ        | -----                       |
| HIPK3_Hs        | (653) | PLVTQAPAV        | QPLQIRPGVLS         | -----                       |
| HIPK3_Mm        | (652) | PLVTQAPAV        | QPLQIRPGVLSQ        | -----                       |
| HIPK3_Gg        | (652) | PLVTQAHAI        | QPLQIRAGILS         | -----                       |
| HIPK3_Xt        | (654) | PLVTQAPAI        | QPLQIRAGVLT         | -----                       |

|                 |       |       |          |                                          |
|-----------------|-------|-------|----------|------------------------------------------|
|                 |       | 751   |          | 800                                      |
| HIPK1_Hs        | (731) | CAAGR | PALVEQTA | AAVLQAWPGGTQQILLPSTWQQLPGVALHNSVQPTAMI   |
| HIPK1_Mm        | (731) | CAAGR | PALVEQTA | AAVLQAWPGGTQQILLPSAWQQLPGVALHNSVQPAAVI   |
| HIPK1_Gg        | (730) | CAAGR | PALVEQTA | AAVLQAWPGGTQQILLPSTWQQLPGVALHNSVQPAAVI   |
| HIPK1_Xt        | (702) | ----- | -----    | AWPGGTQQILLPSTWQQLPGVALHNSVQPTAMI        |
| <b>HIPK1_X1</b> | (700) | ----- | -----    | <b>AWPGGTQQILLPSTWQQLPGVALHNSVQPSAMI</b> |
| HIPK2_Hs        | (678) | ----- | -----    | QAWPSGTQQILLPPAWQQLTGVATHTSVQHATVI       |
| HIPK2_Mm        | (705) | ----- | -----    | QAWPGGAQQILLPPAWQQLTGVATHTSVQHAIVI       |
| HIPK2_Gg        | (707) | ----- | -----    | QAWPSGTQQILLPPAWQQLTGVATHTSVQHATVI       |
| HIPK2_Xt        | (666) | ----- | -----    | QAWPSGTQQILLPPAWQQLAGVAHTSVQHATVI        |
| HIPK3_Hs        | (673) | ----- | -----    | QTWSGRTQQMLVP-AWQQVTPLAPATTTLTSESV       |
| HIPK3_Mm        | (673) | ----- | -----    | QTWSGRTQQMLIP-AWQQVTPMAPAAATLTSEGM       |
| HIPK3_Gg        | (672) | ----- | -----    | QTWSNHTQQILVP-AWQQVAPVAAPATSLASDPV       |
| HIPK3_Xt        | (674) | ----- | -----    | QAWSNGTQPILVP-AWQQMTTIAPTASSLASDTM       |

← Homeodomain-Interacting Domain

801

850

|                 |       |                   |                                                |
|-----------------|-------|-------------------|------------------------------------------------|
| HIPK1_Hs        | (781) | PEAMGSGQQ         | LADWR-NAHSHGNQYSTIMQQPSLLTNHVTLATAQPLNVGV      |
| HIPK1_Mm        | (781) | PEAMGSSQQ         | LADWR-NAHSHGNQYSTIMQQPSLLTNHVTLATAQPLNVGV      |
| HIPK1_Gg        | (780) | PETIGSSQQ         | LADWR-NAHSHGNQYSTLMQQPSLLTNHVTLATAQPLNVGV      |
| HIPK1_Xt        | (735) | PETIGNNQQL        | TDWR-NAHSHGNQYSTLMQQPSLLANHVTLAAAQPLNVGV       |
| <b>HIPK1_X1</b> | (733) | <b>PETIGNNQQL</b> | <b>TDWRNAHSHGNQYSTLMQQPSLLANHVTLAAAQPLNVGV</b> |
| HIPK2_Hs        | (712) | PETMAGTQQ         | LADWR-NTHAHGSHYNPIMQQPALLTGHVTLPAQAQPLNVGV     |
| HIPK2_Mm        | (739) | PETMAGTQQ         | LADWR-NTHAHGSHYNPIMQQPALLTGHVTLPAQAQPLNVGV     |
| HIPK2_Gg        | (741) | PESMAGTQP         | LADWR-NTHAHGSHYNPIMQQPALLASHVTLPAQAQPVNVGV     |
| HIPK2_Xt        | (700) | PDGMAGTQQ         | LADWR-NTHAHGTHYNPIMQQPALLTGHVTLPSAQAQPLNVGV    |
| HIPK3_Hs        | (706) | AGSH----          | RLGDWG-KMISCSNHYNVMPQP-LLTNQITLSAPQPVSVGI      |
| HIPK3_Mm        | (706) | AGSQ----          | RLGDWG-KMIPHSNHYNVMPPP-LLTNQITLSAPQPI SVGI     |
| HIPK3_Gg        | (705) | AGPQ----          | RLGDWG-KMITQGTHYNVMPQP-LLTHQITFSAPQPI SVGI     |
| HIPK3_Xt        | (707) | AGPQ----          | RLGDWG-KVIPHGNYNSMIIQP-IITNQMTLSAPQPI SLGI     |

851 Dsh-Interacting Region →

900

|                 |       |                                                   |                      |
|-----------------|-------|---------------------------------------------------|----------------------|
| HIPK1_Hs        | (830) | AHVVRQQQSSSLPSKKNKQS                              | -----APV-SSK-        |
| HIPK1_Mm        | (830) | AHVVRQQQSSSLPSKKNKQS                              | -----APV-SSK-        |
| HIPK1_Gg        | (829) | AHVVRQQQSSNVPKKNKQP                               | -----APSTAN--        |
| HIPK1_Xt        | (784) | AHVVRQQQNSNTSTKKNKQQ                              | -----ASQSSSK-        |
| <b>HIPK1_X1</b> | (783) | <b>AHVVRQQQNSNTSTKKNKQQ</b>                       | <b>-----ASQKSSK-</b> |
| HIPK2_Hs        | (761) | AHVMRQQPTSTTSSRKSQKH                              | -----QSSVRNVS        |
| HIPK2_Mm        | (788) | AHVMRQQPTSTTSSRKSQKH                              | -----QSSVRNVS        |
| HIPK2_Gg        | (790) | AHVMRQPPAAATSTRKSQKH                              | -----QSAPRNAS        |
| HIPK2_Xt        | (749) | AHVMRQQPTSSSSSSR-KKH                              | -----HSLARNIS        |
| HIPK3_Hs        | (750) | AHVVPQPATTKKNKQCQNRGILVKLMEWEPGREEINAFSWSNSLQNTNI |                      |
| HIPK3_Mm        | (750) | AHVVPQPATTKKNKLCQNR                               | -----S-NSLQNTNI      |
| HIPK3_Gg        | (749) | AHVVPQPAATKRNLKQNR                                | -----S-NALQNTNI      |
| HIPK3_Xt        | (751) | AHVVPQPAANKRNLKQNR                                | -----I-NAIQDIVV      |

901

SRS/PEST 950

|                 |       |                    |                                           |
|-----------------|-------|--------------------|-------------------------------------------|
| HIPK1_Hs        | (856) | -----SSLDVLP       | SQVYSLVGSSPLRTTSS-----YNSL                |
| HIPK1_Mm        | (856) | -----SSLEVL        | PSQVYSLVGSSPLRTTSS-----YNSL               |
| HIPK1_Gg        | (855) | -----STLET         | VPTQVYSLIGSSPLRSTSSS-----SNVL             |
| HIPK1_Xt        | (811) | ----ALSSLD         | VIPSPQVYSLVGSSPLQASSS-----YNPL            |
| <b>HIPK1_X1</b> | (810) | <b>----ALSCLDI</b> | <b>IPSQVYSLVGSSPLQASSS-----YNPL</b>       |
| HIPK2_Hs        | (789) | TCEVSSSQAISSP      | QRSKRVKENTPPRCAMVHSSPACSTSVTCGWGDVASS     |
| HIPK2_Mm        | (816) | TCEVTSSQAISSP      | QRSKRVKENTPPRCAMVHSSPACSTSVTCGWGDVASS     |
| HIPK2_Gg        | (818) | TYEVSSSQSIS        | SPQRSKRVKENTPPRCAMVHNSPACSTAVTCGWGDMATS   |
| HIPK2_Xt        | (776) | AYEVTSSQSVNS       | PQRSKRVKENTPPRCAVPQNTTACVPSITCGWGD SAVG   |
| HIPK3_Hs        | (800) | PHSAFISPKI         | INGKDVEEVSCIETQDNQNSEGEAR--NCCETSIRQDSDS  |
| HIPK3_Mm        | (779) | PHSAFISPKI         | ISGKEVEEVSCVDTQDNHTSEGEAR--TCREASVRQDSS-  |
| HIPK3_Gg        | (778) | QNSALISPKI         | INLKAVKRISCI EAQDNHNSDGQES--NCCEASVRLEPDS |
| HIPK3_Xt        | (780) | HNPVVASPKI         | VSENTRAEESALPQDNHEEKEE---EQSSSNNTQGPAP    |

951

1000

|                 |       |                 |                                                    |
|-----------------|-------|-----------------|----------------------------------------------------|
| HIPK1_Hs        | (884) | VPVQDQHQP       | IIIPDTPSPPVSVITIRSDTDEEEDN-----KYKPSSSGLK          |
| HIPK1_Mm        | (884) | VPVQDQHQP       | IIIPDTPSPPVSVITIRSDTDEEEDN-----KYKPNSSSLK          |
| HIPK1_Gg        | (884) | VPVQEQHQ        | PVIVIPDTPSPPVSVITIRSDTDEEEDS-----KYKPASLGMK        |
| HIPK1_Xt        | (841) | LPLQEQRQ        | PVIVIPDTPSPPVSVITIRSDTDEEEDS-----KYKPTNSGMK        |
| <b>HIPK1_X1</b> | (840) | <b>LPLQEQRQ</b> | <b>PVIVIPDTPSPPVSVITIRSDTDEEEDS-----KYKPTNSGME</b> |
| HIPK2_Hs        | (839) | TTTTRERQR       | QTIVIPDTPSPTVSVITISSDTDEEEEQ-----KHAPTSTVSK        |
| HIPK2_Mm        | (866) | TTTTRERQR       | QTIVIPDTPSPTVSVITISSDTDEEEEQ-----KHAPTSTVSK        |
| HIPK2_Gg        | (868) | TTTTRERQR       | QPIIIPDTPSPAVSVITISSDTDEEEEQ-----KHAPTSTLSK        |
| HIPK2_Xt        | (826) | GSHNRQR         | QTIVIPDTPSPAVSVITISSDTDEEEEQ-----KHVAPSLP-K        |
| HIPK3_Hs        | (848) | SVSDKQR         | QTIIADSPSPAVSVITISSDTDEEETSQRHSLRECKGSLDCE         |
| HIPK3_Mm        | (826) | -VSDKQR         | QTIIADSPSPAVSVITISSDSDDEETS PRPSLRECKGSLDCE        |
| HIPK3_Gg        | (826) | SLSNKQR         | QAI F IAGSPSPAVSVITISSDTDEDDLQTRSLRECKGSLDCE       |
| HIPK3_Xt        | (827) | DTSIQQQ         | QAIVIGDSPSPTVSVITINSDTDEDDPAQTL SLRECKRSLDCD       |

1001

HIPK1\_Hs (929) PRSNVISYVTVNDSPDSDSSLSSPYSTDTLSALRGNSGSLVLEGPGRVVAD  
HIPK1\_Mm (929) ARSNVISYVTVNDSPDSDSSLSPHPTDTLSALRGNSGTLLEGPGRPAAD  
HIPK1\_Gg (929) QRSNVISYVTVNDSPDSDSSLNSPYATDPLSSLR-STGGALELPSRGAAD  
HIPK1\_Xt (886) LRSNVISYVTVNDSPDSDSSVSSPYLADRHTSVNGVTGVFDMNSRTHAS  
**HIPK1\_X1 (885) LRSNVISYVTVNDSPDSDSSASSPCLADHSSVNAVTVGFVDISNHRAAHS**  
HIPK2\_Hs (884) QRKNVISCVTVHDSPYSDSSSNTSPYSVQQRAGHNNANAFDTKGSLENHC  
HIPK2\_Mm (911) QRKNVISCVTVHDSPYSDSSSNTSPYSVQQRAGHNNANAFDTKGSLENHC  
HIPK2\_Gg (913) QRKNVISCVTVHDSPYSDSSSNTSPYAVQHRAGQNNGNTYDTKGVPEHC  
HIPK2\_Xt (870) QRRNVISCVTVHDSPI SDSSSNTSPYAASGHRRGNNTSAAESKQGTGNPC  
HIPK3\_Hs (898) ACQSTLNIDRMCSLSSPDSTLSTSSSGQSSSPCKRPNSMSDDEQESSCD  
HIPK3\_Mm (875) ACQSTLNIDRMCSLSSPDSTLSTSSSGQSSSPCKRPNSMSDDEQESGCE  
HIPK3\_Gg (876) ACQNTLNIDRVCSLSSQDSTLSTSSSGQSSSPCKRNSMSDDEQESGCD  
HIPK3\_Xt (877) TCQSALN---VCSLSSPDSTLSTSSSGQSSSPCKRRNSISDDEPESGCD

1051 1100

HIPK1\_Hs (979) GT-----GTRTIIVPPLKTQLGDCTVA  
HIPK1\_Mm (979) GI-----GTRTIIVPPLKTQLGDCTVA  
HIPK1\_Gg (978) SS-----NSRTIIVPPLKTQLNDCIVA  
HIPK1\_Xt (936) QSL-----NSRTIIVPPLKQSOMNDCPLD  
**HIPK1\_X1 (935) QSS-----NSRTIIVPPLKSQINDCSLN**  
HIPK2\_Hs (934) TG-----NPRTIIVPPLKTQASEVLVE  
HIPK2\_Mm (961) TG-----NPRTIIVPPLKTQASEVLVE  
HIPK2\_Gg (963) SG-----NPRTIIVPPLKTQASEVLVE  
HIPK2\_Xt (920) PA-----NPRTIIVPPLKTQPSSEGRLE  
HIPK3\_Hs (948) TVDGSPTSDSSGHDSPPFAESTFVEDTHELTVSSADTETKPAVCSVVVP  
HIPK3\_Mm (925) TVDGSPTSDSSGHDSPPFAENFVEDAHQNTLGTGAGPEAKPAVGTAVEP  
HIPK3\_Gg (926) TVDGSPTSDSSGHDSPPFVEDGFVANTNKNKEARASVNSETKSAVCTVVVP  
HIPK3\_Xt (924) TVNGSPSSDSSGHDSPPFKN-SFVRDSNQNTESRTPKTDKPAVCTVVVP

1101 1150

HIPK1\_Hs (1001) TQASGLLS---NKTTPVASVS-GQSSGCCITPTGYRAQRGGTSAQAQPLN  
HIPK1\_Mm (1001) TQASGLLS---SKTKPVASVS-GQSSGCCITPTGYRAQRGGASAVQPLN  
HIPK1\_Gg (1000) TQASGILSN--TSKTKPVASVS-GQSSGCCITPTGYRPHRVVANGVQPLN  
HIPK1\_Xt (959) TQLTGVLSG--AAKITKCTATNGQSSS-CITQTGCRSHR-MLNGVQPLN  
**HIPK1\_X1 (958) TQLTGVLSS--AAKINKTCTATNGQSSSCTITQTGQRSHR-MLNGVQPLN**  
HIPK2\_Hs (956) CDSLVPVN--TSHHSSSYKSKSSSNTSTSGHSSGSSSGAITRQQRPGP  
HIPK2\_Mm (983) CDSLGPAIN--ASHHSSSFYKSKSSSTVTSTSGHSSGSSSGAIAYRQQRPGP  
HIPK2\_Gg (985) CDSLAPGTVTTSHHSSSYKSKSSSTVTSTSGHSSGSSSGAVAYRQQRPGA  
HIPK2\_Xt (942) CERKQPD---TSHHMYK--AKLLSSVASASHSSASSAGTAYRHSRAPGH  
HIPK3\_Hs (998) PVELEGNLADEHMAN-TDSICQPLIKGRSAPGRLNQPSAVGTRQOKLTS  
HIPK3\_Mm (975) PVGRESGLSVGEHMAN-TDSTCQPLRKGQPAPGKLHQPALGARQQKPA  
HIPK3\_Gg (976) PMSLENRLRLDEQMVNTEDATCQPLKNGRSVLGRKTQSSAVGNRQOKLAS  
HIPK3\_Xt (973) PIRIEN-RQFNSHRVSNKDTVCYPVIKGRSAPGRINHPNSLGRSQOKLAS

1151 1200

HIPK1\_Hs (1046) LSONQQSSAAPTQERSNPAPRR----QQAFVAPLS----QAPYTFQHG  
HIPK1\_Mm (1046) LSONQQSSASTQERSNPAPRR----QQAFVAPLS----QAPYAFQHG  
HIPK1\_Gg (1047) LSONQQTTVLAS-QERSGNAVPRR----QQAYVAPLTSTISQAPYTFQHS  
HIPK1\_Xt (1005) LSON-QQSAMMGTQERSMNPGRSRR----QQAYVAPLP-SISQAPFTFQHS  
**HIPK1\_X1 (1005) LSON-QQSALVGTQERSMNPGRSRR----QQAYVAPIP-SISQAPFTFQHN**  
HIPK2\_Hs (1004) HFQQQQPLNLSQAQQHITTDRTGS----HRRQQAYITPTMAQAPYSFPHN  
HIPK2\_Mm (1032) HFQQQQPLNLSQAQQHMAADRTGS----HRRQQAYITPTMAQAPYTFPHN  
HIPK2\_Gg (1035) HFQQQQPLNLSQAQQHITTDRTGS----HRRQQAYITPTIAQAPYSFPHN  
HIPK2\_Xt (987) SFQQQ-PLNLSQVSQHIISTERTGS----HRRQHAYIAPTIAQAPYSFPHS  
HIPK3\_Hs (1047) AFQQQH-LNFSQVQHFSGHQEWNGNFGHRRQQAYIPTSVTSNPFTLSHG  
HIPK3\_Mm (1024) AFPQQH-LNLSQVQHFSGHQEWNGNFGHRRQQAYIPTSVTSNPFTLSHG  
HIPK3\_Gg (1026) AFHQQH-LNFSQVQHFSGAPQEWNGNYAHRQQAYIPASVASHAFSLPQG  
HIPK3\_Xt (1022) AFHQHPPLNYSKVQHFSGHQEWNGNYGHMRQQAYMQPTVASHPFTLQHG

|                 |        | 1201                            | 1250                               |
|-----------------|--------|---------------------------------|------------------------------------|
| HIPK1_Hs        | (1088) | SPLHSTGHPHLAPAPAHLP----         | SQAHLYTYAAPTSAALGSTSSIAHLF         |
| HIPK1_Mm        | (1088) | SPLHSTGHPHLAPAPAHLP----         | SQPHLYTYAAPTSAALGSTSSIAHLF         |
| HIPK1_Gg        | (1092) | SPVHP--HLAAATANAHLS----         | SQPHMYTYAP-TTAATLGSTTSIAHLF        |
| HIPK1_Xt        | (1049) | SPLHSTVHPHLAAAATATS-HLTS        | SQPHMYTYAP-TTAASLGSTTSIAHLF        |
| <b>HIPK1_X1</b> | (1049) | <b>SPLHSTVHPHLAAAAASATSHLTS</b> | <b>SQPHMYTYAP-TTAASLGSTTSIAHLF</b> |
| HIPK2_Hs        | (1050) | SPSHGTVHPHLAAAAAAHLP--          | TQPHLYTYTA---PAALGSTGTVAHLV        |
| HIPK2_Mm        | (1078) | SPSHGTVHPHLAAAA--HLP--          | TQPHLYTYTA---PTALGSTGTVAHLV        |
| HIPK2_Gg        | (1081) | SPSHGTVHPHLAAAAAA-HLP--         | TQPHLYTYTT---PAALGSTGTVAHLV        |
| HIPK2_Xt        | (1032) | SPSHGAVHPHLAAAH---LP---         | SQPHLYTYTA---PAALGSSGTVAHLV        |
| HIPK3_Hs        | (1096) | SPNHTAVHAHLAGNTHLGG----         | QPTLLPYPS---SATLSSAAPVAHLL         |
| HIPK3_Mm        | (1073) | SPNHTAVHAHLDGSTHLGG----         | QPTLLPYPS---SASLSSAAPVAHLL         |
| HIPK3_Gg        | (1075) | SPNPTTVHAHLGSGSTHLGG----        | QPAILPYPS---SAPLSTAAPVAHLL         |
| HIPK3_Xt        | (1072) | SPTHSAHHAHLGAGSTHIGG----        | QPAILSYP---SASLSSAAPVAHLL          |

|                 |        | 1251                   | Dsh-Interacting Region       | 1300                      |
|-----------------|--------|------------------------|------------------------------|---------------------------|
| HIPK1_Hs        | (1134) | SPQGSSR----            | HAAAYTTHPSTLVHQVPVSVG        | PSLLTSASVAPAQYQHQF        |
| HIPK1_Mm        | (1134) | SPQGSSR----            | HAAAYTTHPSTLVHQVPVSVG        | PSLLTSASVAPAQYQHQF        |
| HIPK1_Gg        | (1135) | SPQGSS-----            | RHTQYAAHPSTLVHQVPVSVG        | PSLLTSANVPPAQYQHQF        |
| HIPK1_Xt        | (1097) | SPQGSS-----            | RHTTFATHPSTLVHQVPVSVG        | PSLLTSANVASAQYPHQF        |
| <b>HIPK1_X1</b> | (1098) | <b>SPQGSS-----</b>     | <b>RHTTFSTHPSTLVHQVPVSVG</b> | <b>PSLLTSANVASAQYPHQF</b> |
| HIPK2_Hs        | (1095) | ASQGSAR----            | HTVQHTAYPASIVHQVPVSMG        | PRVLPSTIHPQSQYPAQF        |
| HIPK2_Mm        | (1120) | ASQGSAR----            | HTVQHTAYPASIVHQVPVSMG        | PRVLPSTIHPQSQYPAQF        |
| HIPK2_Gg        | (1125) | ASQGSAR----            | HAVQHTTYPASIVHQVPVSMG        | PRVLPSTIHPQSQYQAQF        |
| HIPK2_Xt        | (1073) | ASQG-----              | SARHAAYPASIVPVSMARQLL        | LPSPSLHPSQYQAQF           |
| HIPK3_Hs        | (1138) | ASPCTSRPMLQHPTYNISHPSG | IVHQVPVGLNPRLLPSPTIHQT       | QYKPIF                    |
| HIPK3_Mm        | (1115) | ASPCTSRPMLQHPTYNISHPSG | IVHQVPVGINPRLLPSPTIHQT       | QYKPIF                    |
| HIPK3_Gg        | (1117) | ASPCTSRPMLQHPTYNISHPSG | IVHQVPVGINPRLLPSPTIHQT       | QYKPIF                    |
| HIPK3_Xt        | (1114) | ASPCTSRPILQHPTYSLSHPSG | IVHQVAVGINPRLLPSPTIHQT       | QFKPIF                    |

|                 |        | 1301                       | 1331               |
|-----------------|--------|----------------------------|--------------------|
| HIPK1_Hs        | (1180) | ATQSYIGSSRGSTIYTGYP        | SPTKISQYSYL        |
| HIPK1_Mm        | (1180) | ATQSYIGSSRGSTIYTGYP        | SPTKISQYSYL        |
| HIPK1_Gg        | (1180) | APQSYIGASRGSAIYTGYP        | SPTKINQYSYL        |
| HIPK1_Xt        | (1142) | AAQSYIGASRGSAIYTGYP        | SPTNINQYSYL        |
| <b>HIPK1_X1</b> | (1143) | <b>ATPSYIGASRGSAIYTGYP</b> | <b>SPTNINQYSYL</b> |
| HIPK2_Hs        | (1141) | AHQTYISASPASTVYTGYP        | SPAKVNQYPYI        |
| HIPK2_Mm        | (1166) | AHQTYISASPASTVYTGYP        | SPAKVNQYPYI        |
| HIPK2_Gg        | (1171) | AHQTYISASPASTVYTGYP        | SPTKVNQYPYI        |
| HIPK2_Xt        | (1112) | AHQTYIPASPTSTVYTGYP        | TPPKVNQYPYI        |
| HIPK3_Hs        | (1188) | PPhSYIAASP---              | AYTGFPLSPTKLSQYPYM |
| HIPK3_Mm        | (1165) | PPhSYIAASP---              | AYTGFPLSPTKVSQYPYM |
| HIPK3_Gg        | (1167) | PPhSYIAASP---              | AYTGFPLSPTKLSQYPFM |
| HIPK3_Xt        | (1164) | PSHSYITASP---              | AYAGFPMSPTKLSQYPYM |
