# Supplementary material for: Modulation of the β-Catenin Signaling Pathway by the Dishevelled-Associated Protein Hipk1
Source: PubMed Central journal article supplement (PMC2629544; doi:10.1371/journal.pone.0004310), 2009-02-02
Supplement: pone.0004310.s006.pdf [file pone.0004310.s006.pdf]

### Supplemental Table 1. DMZ mRNA injection statistics

| <u>Condition</u> | <u>ng/embryo</u> | <u>% Full<br/>defect</u> | <u>% Partial<br/>defect</u> | <u>% Normal</u> | <u>Total #*</u> |
|------------------|------------------|--------------------------|-----------------------------|-----------------|-----------------|
| $\beta$ gal mRNA | 1.6              | 2                        | 0                           | 98              | 46              |
| Hipk1 mRNA       | 0.4              | 4                        | 8                           | 88              | 48              |
| Hipk1 mRNA       | 0.8              | 11                       | 24                          | 64              | 45              |
| Hipk1 mRNA       | 1.6              | 57                       | 23                          | 20              | 44              |

\*total from one representative experiment

#### Legend

ng/embryo = nanograms of reagent injected per embryo

% Full defect = percent of embryos with no neural fold fusion along anterior/posterior axis

% Partial defect= percent of embryos with partially fused neural folds along axis

% Normal = percent of embryos with normally fused neural folds along entire axis

Total # = number of embryos surviving past gastrulation
