# Supplementary material for: Modulation of the β-Catenin Signaling Pathway by the Dishevelled-Associated Protein Hipk1
Source: PubMed Central journal article supplement (PMC2629544; doi:10.1371/journal.pone.0004310), 2009-02-02
Supplement: pone.0004310.s007.pdf [file pone.0004310.s007.pdf]

## Supplemental Table 2. DMZ morpholino injection statistics

| <u>Condition</u> | <u>ng/embryo</u> | <u>% Full defect</u> | <u>% Partial defect</u> | <u>% Normal</u> | <u>Total #*</u> |
|------------------|------------------|----------------------|-------------------------|-----------------|-----------------|
| Uninjected       | 0                | 0                    | 0                       | 100             | 179             |
| CoMO             | 80               | 3                    | 2                       | 95              | 457             |
| Hipk1MO1         | 20               | 22                   | 30                      | 48              | 179             |
| Hipk1MO1         | 40               | 70                   | 19                      | 11              | 253             |
| Hipk1MO1         | 80               | 71                   | 26                      | 3               | 75              |
| Uninjected       | 0                | 0                    | 1                       | 99              | 232             |
| CoMO             | 32               | 7                    | 7                       | 86              | 136             |
| Hipk1MO2         | 8                | 4                    | 18                      | 78              | 120             |
| Hipk1MO2         | 16               | 39                   | 23                      | 38              | 121             |
| Hipk1MO2         | 32               | 72                   | 19                      | 9               | 127             |

\*combined total from 3 independent experiments

### Legend

ng/embryo = nanograms of reagent injected per embryo

% Full defect = percent of embryos with no neural fold fusion along anterior/posterior axis

% Partial defect= percent of embryos with partially fused neural folds along axis

% Normal = percent of embryos with normally fused neural folds along entire axis

Total # = number of embryos surviving past gastrulation
